# Supplementary material
Source: publisher site journal article supplement (https://www.dovepress.com/article/525675)
Supplement: Supplementary file 1 [file 525675-supplementary-materials_10_1.docx]

**Supplementary Material**

**Table S1. Identification results of chemical components**

| Serial number | retention time（min） | Adduct ions | M/Zactual value | M/Z Theoretical value | ppm | Molecular formula | Name | MS/MS spectra |
| --- | --- | --- | --- | --- | --- | --- | --- | --- |
| 1 | 0.969 | [M-H]- | 195.0506 | 195.051 | -2.1 | C6H12O7 | Gluconic acid | 96.9601;78.9585;75.0079;71.0130 |
| 2 | 1.404 | [M-H]- | 133.0145 | 133.0142 | 2.3 | C4H6O5 | Malic acid | 115.0094;99.9242;71.0130 |
| 3 | 6.009 | [M-H]- | 169.0145 | 169.0142 | 1.8 | C7H6O5 | Gallic acid | 125.0242;79.0189 |
| 4 | 7.883 | [M+H]+ | 268.1045 | 268.104 | 1.9 | C10H13N5O4 | Adenosine | 136.0622;119.0358 |
| 5 | 8.035 | [M-H]- | 267.0736 | 267.0735 | 0.4 | C10H12N4O5 | Inosine | 135.0312;134.0452;108.0191 |
| 6 | 8.037 | [M+H]+ | 284.1011 | 284.0989 | 7.7 | C10H13N5O5 | Guanosine | 152.0570;135.0309;110.0356 |
| 7 | 11.61 | [M-H]- | 193.0508 | 193.0506 | 0.7 | C10H10O4 | Ferulic acid | 134.04 |
| 8 | 12.918 | [M+FA-H]- | 502.155 | 502.1572 | -4.4 | C20H27NO11 | D-Amygdalin | 456.1497;323.0967;179.0552;89.0239 |
| 9 | 17.656 | [M+FA-H]- | 525.1597 | 525.1614 | -3.2 | C23H28O11 | Paeoniflorin | 449.1424;327.1075;165.0554;121.0282 |
| 10 | 18.214 | [M-H]- | 611.1606 | 611.1618 | -2.0 | C27H32O16 | Hydroxysafflor Yellow A | 611.1449;449.0999;287.0520 |
| 11 | 23.083 | [M-H]- | 609.149 | 609.1461 | 4.8 | C27H30O16 | Kaempferol 3-O-sophoroside | 609.1441;301.0344;128.9604 |
| 12 | 24.492 | [M-H]- | 300.999 | 300.999 | 0.0 | C14H6O8 | Ellagic acid | 300.9988;229.0145;145.0288 |
| 13 | 25.029 | [M-H]- | 609.1456 | 609.1461 | -0.8 | C27H30O16 | Rutin | 609.1462;300.0279;271.0244 |
| 14 | 25.245 | [M+H]+ | 291.0857 | 291.0863 | -2.1 | C15H14O6 | Catechin | 207.0655;165.0549;147.0445;139.0393;123.0444 |
| 15 | 28.169 | [M-H]- | 187.0979 | 187.0976 | 1.6 | C9H16O4 | Azelaic acid | 169.0879;152.8938;125.0977;123.0814 |
| 16 | 37.544 | [M-H]- | 283.0617 | 283.0612 | 1.8 | C16H12O5 | Calycosin | 283.0612;268.0378;211.0400 |
| 17 | 41.673 | [M+H]+ | 189.0916 | 189.091 | 3.2 | C12H12O2 | Z-Butylidenephthalide | 133.0297;128.0629 |
| 18 | 42.628 | [M+FA-H]- | 829.4594 | 829.4591 | 0.4 | C41H68O14 | Astragaloside III | 829.4586;783.4602 |
| 19 | 42.747 | [M+FA-H]- | 829.4599 | 829.4591 | 1.0 | C41H68O14 | Astragaloside IV | 829.4610;783.4540 |
| 20 | 43.841 | [M+FA-H]- | 871.474 | 871.4697 | 4.9 | C43H70O15 | Isoastragaloside II | 871.4716;825.4680 |
| 21 | 44.495 | [M+H]+ | 193.123 | 193.1223 | -0.9 | C12H16O2 | Senkyunolide A | 193.1248;147.1165;137.0611 |
| 22 | 45.02 | [M+FA-H]- | 913.4798 | 913.4802 | -0.4 | C45H72O16 | Astragaloside I | 913.4786;867.4679 |
| 23 | 45.52 | [M+FA-H]- | 913.4798 | 913.4802 | -0.4 | C45H72O16 | Isoastragaloside I | 913.4708;867.4752 |
| 24 | 46.099 | [M+H]+ | 191.107 | 191.1067 | 1.6 | C12H14O2 | E-Ligustilide | 191.1094;173.0972;129.0702 |
| 25 | 48.216 | [M+H]+ | 191.1073 | 191.1067 | 3.1 | C12H14O2 | Z-Ligustilide | 191.1046;173.0967;105.0711 |

**Table S2. Data-independent-acquisition-based proteomic study**

| Plasma protein extraction | Fasting venous blood samples were collected from participants in the morning and aliquoted into 2 ml anticoagulant tubes containing EDTA for centrifugation. The supernatant was centrifuged at 4°C at 3000 ×g for 15 minutes, collected into Eppendorf tubes, labeled, and stored at -80°C. Protein extraction and identification were conducted by Beijing Novogene Co., Ltd., using the Proteominer low-abundance protein enrichment kit (Bio-Rad, USA) to remove high-abundance proteins. Protein concentrations were measured with the Bradford Protein Assay Kit (Beyotime, China). After peptide desalting through enzymatic digestion, the samples were analyzed using LC-MS/MS. |
| --- | --- |
| LC-MS/MS Analysis-DIA mode | Prepare mobile phase A (100% water, 0.1% formic acid) and B (80% acetonitrile, 0.1% formic acid). The lyophilized powder was dissolved using 10µLA solution, centrifuged at 14,000g for 20min at 4°C, and 200 ng of the supernatant sample was injected into the sample for liquid-quality detection. The Vanquish Neo upgraded UHPLC system was used with a C18 pre-column of 174500 (5 mm×300 μm,5 μm, Thermo Fisher, USA) heated at 50°C in a column oven, and a C18 analytical column of ES906 (PepMap TM Neo UHPLC 150µm x 15 cm, 2 μm, Thermo Fisher, USA). The Orbitrap Astral mass spectrometer was used (Thermo Fisher, USA), an ESI ion source was used, the ion spray voltage was set to 1.9 kV, the ion transfer tube temperature was set to 290°C, and the mass spectrum was in a data-dependent acquisition mode, with a full first-stage mass spectrometry scanning range of m/z 380-980. The primary MS resolution was set to 240000 (200m/z), AGC was set to 500%, the parent ion window size was set to 2-Th, the number of DIA windows was 300, the NCE was set to 25%, the secondary m/z acquisition range was from 150 to 2000, the sub-ion resolution Astral was set to 80000, and the maximal injection time was 3ms. Into mass spectrometry detection raw data (.raw). |
| Trusted protein analysis | The raw files were searched and analyzed using the DIA-NN library search software, according to the homo_sapiens_uniprot_2023_10_18_Swissprot.fasta（20427 sequences） database. The library search parameters were set as follows: a mass tolerance of 10 ppm for precursor ions and 0.02 Da for fragment ions. Cysteine was modified by alkylation, methionine was oxidatively modified, and N-terminal modifications included acetylation, loss of methionine, and loss of methionine + acetylation. One missed cleavage site was allowed at most. To improve the quality of the analytical results, the DIA-NN software further filtered the search results by retaining only credible PSMs with a confidence level of 99% or higher. Only credible spectral peptides and proteins were retained, and FDR validation was performed to remove peptides and proteins with an FDR greater than 1%. |

**Table S3.** **Detailed procedures for targeted metabolomics**

| Sample preparation | Fasting venous blood samples were collected from participants in the morning and aliquoted into 2 ml anticoagulant tubes containing EDTA for centrifugation. The supernatant was centrifuged at 4°C at 3000 ×g for 10 minutes, collected into Eppendorf tubes, labeled, and stored at -80°C. Target metabolite extraction was performed. A 100 μL sample was combined with 300 μL of methanol-water solution, vortexed, and left on ice for 15 minutes. The mixture was centrifuged at 12000 rpm at 4°C for 15 minutes. A 50 μL aliquot of the supernatant was mixed with 150 μL of derivatization reagent and incubated at 40°C for 40 minutes. Subsequently, 90 μL of the supernatant was combined with 10 μL of internal standard solution, vortexed, and subjected to LC-MS analysis. Accurate quantitative analysis was conducted for 478 metabolites, including 92 amino acids, 62 aromatic compounds, 43 organic acids, 38 bile acids, 19 fatty acids, 26 carbohydrates, 24 indoles, 23 nucleosides, nucleotides, and analogs, 14 phenylpropanoids, 9 pyridines, and 128 other compounds. The metabolites were sourced from Zhenzhun Biotechnology Co., Ltd. (Shanghai), Aladdin Biochemical Technology Co., Ltd. (Shanghai), and Sigma-Aldrich (USA). |
| --- | --- |
| Standard curve establishment | Accurately weigh the standard substances of each metabolite, prepare a mixed stock solution, and dilute it with methanol to obtain a series of working solutions at different concentrations. Prepare an internal standard solution at a defined concentration, mix well, and obtain the final internal standard solution. The stock and working solutions of the linear standards, internal standards, and quality controls were stored at -20°C. Perform LC-MS analysis on the concentration series of standard solutions. The ratio of the standard concentration to the internal standard concentration is plotted on the x-axis, and the ratio of the peak area of the standard to that of the internal standard is plotted on the y-axis to evaluate the linearity of the standard solutions. |
| LC-MS/MS Analysis | UHPLC-MS/MS system (ExionLC™ AD UHPLC-QTRAP 6500+, AB SCIEX Corp., Boston, MA, USA) was used to quantitate metabolite. Separation was performed on a Waters HSS T3 column (2.1×150mm) which was maintained at 40°C. The mobile phase, consisting of 0.1% formic acid in water (solvent A) and acetonitrile/isopropanol (1:1) (solvent B), was delivered at a flow rate of 0.30 mL/min. The solvent gradient was set as follows: 5% B, 1 min; 5-40% B, 7 min; 40-95% B, 25 min; 95-5% B, 27.1 min; 30 min; 5% B. The mass spectrometer was operated in positive/negative multiple reaction mode (MRM) mode. Parameters were as follows: IonSpray Voltage (4500V/-4500V), Sheath Gas (35psi), Ion Source Temp (550°C), Auxiliary Gas (50psi), Collision Gas (55psi). |
| Data processing and analysis | After transforming the data using the metabolomics data processing software metaX, principal component analysis (PCA) and partial least squares discriminant analysis (PLS-DA) were conducted, to derive the variable importance in projection (VIP) for each metabolite. The t-test was applied to calculate the statistical significance of each metabolite between the two groups, and the fold change (FC) values for the metabolites were determined. Upregulated metabolites with an FC > 1.2, downregulated metabolites with an FC < 0.833, and VIP > 1 were used as the criteria to select DMs. |

**Table S4. Quantitative Real-Time PCR Primer Sequence**

| Gene |  | Primer | Gene ID | Amplicon Size(bp) |
| --- | --- | --- | --- | --- |
| Clinical Samples | | | | |
| ACTG1 | Forward | CCGAGCCGTGTTTCCTTCC | 71 | 142 |
| Reverse | GCCATGCTCAATGGGGTACT |
| SOD2 | Forward | TTTCAATAAGGAACGGGGACAC | 6648 | 109 |
|  | Reverse | GTGCTCCCACACATCAATCC |
| H3-3A | Forward | TGTGGCGCTCCGTGAAATTAG | 3020 | 145 |
|  | Reverse | CTGCAAAGCACCGATAGCTG |
| HMGB1 | Forward | TATGGCAAAAGCGGACAAGG | 3146 | 196 |
|  | Reverse | CTTCGCAACATCACCAATGGA |
| PGAM1 | Forward | GTGCAGAAGAGAGCGATCCG | 5223 | 115 |
|  | Reverse | CGGTTAGACCCCCATAGTGC |
| HIF-1α | Forward | GAACGTCGAAAAGAAAAGTCTCG | 3091 | 124 |
|  | Reverse | CCTTATCAAGATGCGAACTCACA |
| mTOR | Forward | TCCGAGAGATGAGTCAAGAGG | 2475 | 141 |
|  | Reverse | CACCTTCCACTCCTATGAGGC |  |  |
| P4DI4 | Forward | CAGGGGACATTGATCCGTGTG | 23569 | 130 |
|  | Reverse | GGGAGGCGTTGATGCTGAA |  |  |
| In Vitro H9C2 Experiments | | | | |
| H3-3A | Forward | ATTCGCAAGCTCCCCTTTCA | 100361558 | 159 |
|  | Reverse | GGCATGGATAGCACACAGGT |  |  |
| SOD2 | Forward | CACCGAGGAGAAGTACCACG | 24787 | 149 |
|  | Reverse | TGGGTTCTCCACCACCCTTA |  |  |
| ACTG1 | Forward | TGTTTCCTTCCATCGTCGGG | 287876 | 148 |
|  | Reverse | CAGTTGGTGACAATGCCGTG |  |  |
| PGAM1 | Forward | TACGGGGCATTGTCAAGCAT | 24642 | 165 |
|  | Reverse | CTTCCATGGCTTTACGCACG |  |  |
| HMGB1 | Forward | TTCTGTTCTGAGTACCGCCC | 25459 | 151 |
|  | Reverse | ACTTCTCCTTCAGCTTGGCG |  |  |

**Table S5. Changes in the incidence of abnormal laboratory indicators after 12 weeks of YQHX treatment**

|  | Baseline（n=40） | Post-treatment（n=40） | *P* |
| --- | --- | --- | --- |
| Blood routine |  |  |  |
| White blood cell count | 4(10.00%) | 6(15.00%) | 0.737 |
| Red blood cell count | 9(22.50%) | 7(17.50%) | 0.781 |
| Neutrophil ratio | 8(20.00%) | 8(20.00%) | 1 |
| Lymphocyte ratio | 11(25.60%) | 7(17.50%) | 0.432 |
| Urine routine |  |  |  |
| urine occult blood | 12(30.00%) | 7(17.50%) | 0.293 |
| Urine leucocyte | 8(20.00%) | 7(17.50%) | 1 |
| Urine protein | 6(15.00%) | 4(10.00%) | 0.737 |
| Urine Ketone | 0 (0.00%) | 1(2.50%) | 1 |
| Hepatic and renal function |  |  |  |
| Alanine transaminase | 6(15.00%) | 5 (12.50%) | 1 |
| Glutamic oxaloacetic transaminase | 2(5.00%) | 4(10.00%) | 0.675 |
| Urea nitrogen | 7(17.50%) | 10(25.00%) | 0.586 |
| Creatinine | 12(30.00%) | 6(15.00%) | 0.427 |
| Coagulation function |  |  |  |
| PT | 4(10.00%) | 4(10.00%) | 1 |
| APTT | 4(10.00%) | 3(7.50%) | 1 |
| TT | 2(5.00%) | 0(0.00%) | 0.494 |
| FIB | 5(12.50%) | 6(15.00%) | 1 |

Data are n (%).

**Table S6. Expression changes and AUC values of candidate biomarkers at transcriptome level**

|  | log2FC (IHF vs HP) | log2FC (YQHX vs IHF) | AUC（95%CI） |
| --- | --- | --- | --- |
| H4C14 | 0.305679246 | -1.16832967 | 0.704（0.591-0.813） |
| H3-3A | 1.081294889 | -1.001624417 | 0.677（0.553-0.798） |
| H2BC7 | -0.192094241 | 1.220602419 | 0.533（0.422-0.684） |
| PPIA | -0.206006101 | -1.240707598 | 0591（0.464-0.711） |
| SOD2 | 1.297709094 | -1.528468151 | 0.656（0.535-0.765） |
| PGAM1 | -0.552105811 | -1.639318525 | 0.688（0.580-0.801） |
| ACTG1 | 1.119667287 | -1.039094737 | 0.664（0.547-0.771） |
| PDHB | 0.416269298 | -1.103802924 | 0.374（0.279-0.478） |

**Table S7. Expression changes and AUC values of candidate biomarkers at the proteome level**

|  | log2FC (IHF vs HP) | log2FC (YQHX vs IHF) | AUC (95%CI) |
| --- | --- | --- | --- |
| FGA | -1.026401074 | 1.33072804 | 0.972（0.936-0.996） |
| LDHA | -0.263990491 | -0.730341841 | 0.723（0.603-0.836） |
| FN1 | -1.573054994 | 1.405607167 | 0.784（0.682-0.876） |
| VWF | -0.78684927 | 1.402587147 | 0.804（0.703-0.887） |
| ACO2 | -0.08815682 | 1.290670498 | 0.738（0.624-0.851） |

**Figure S1**. Chemical fingerprint of YQHX


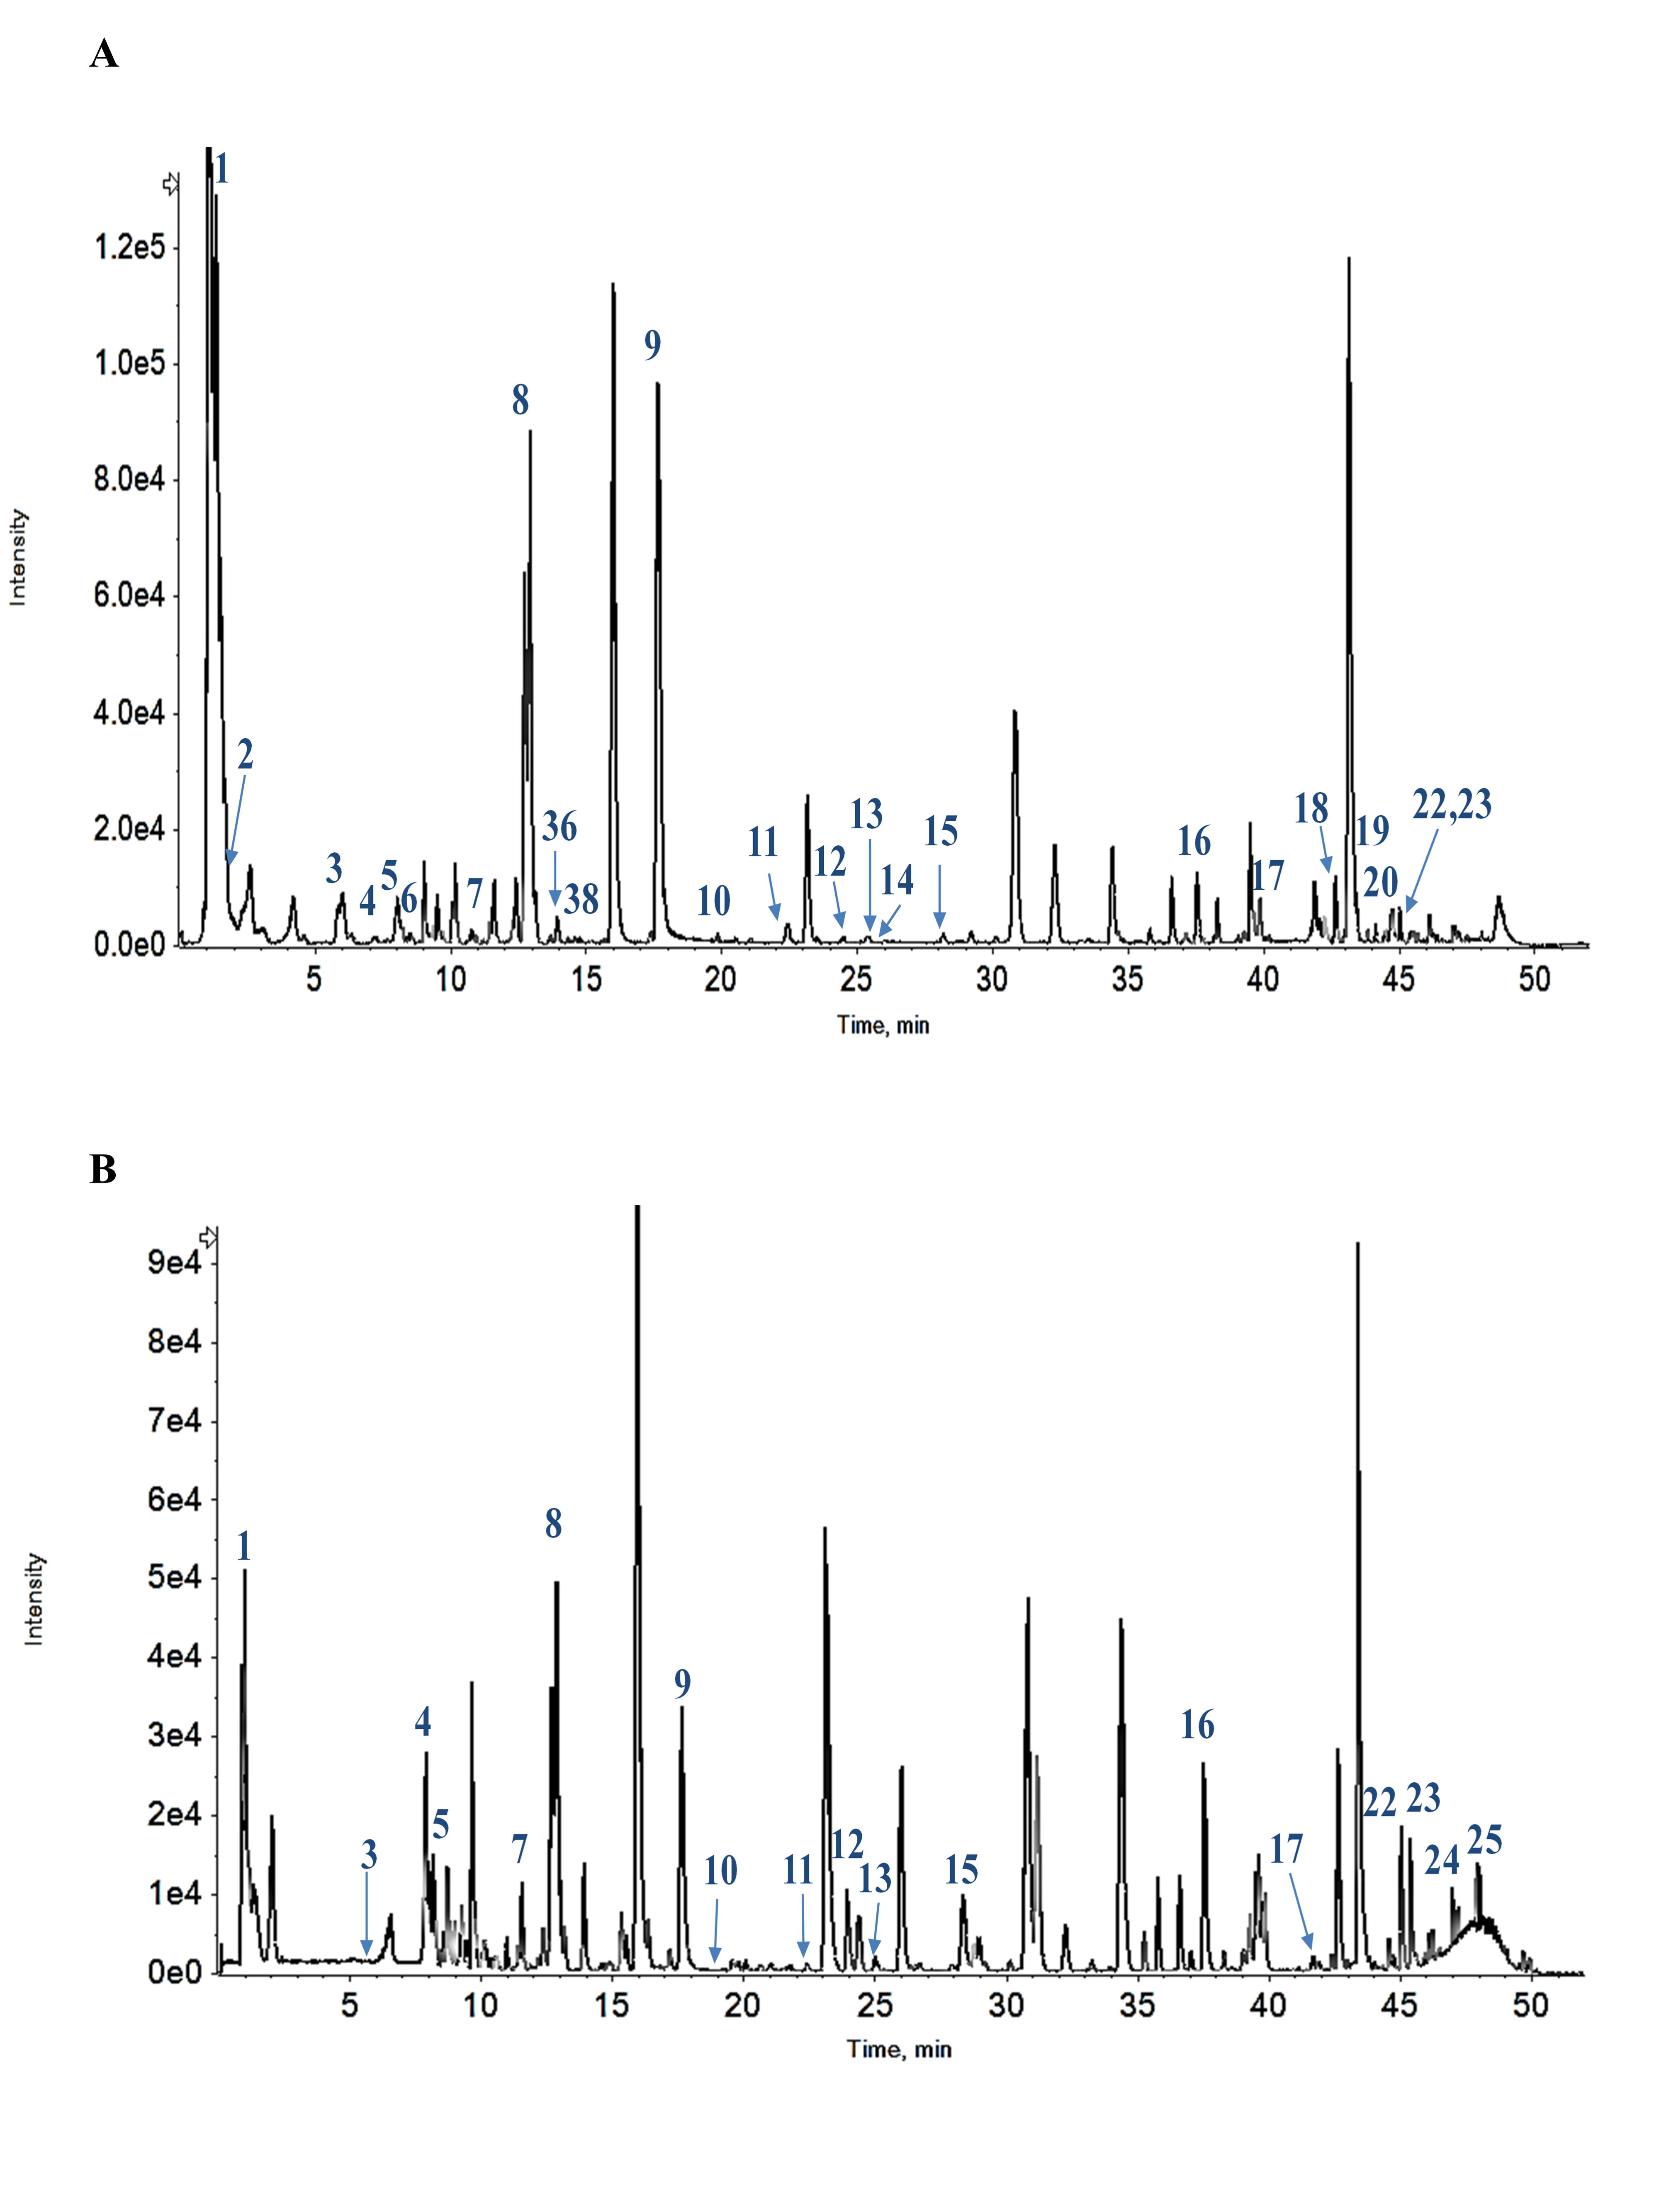
(A)Schematic diagram of chromatographic peak of YQHX (negative ion mode). (B)Schematic diagram of chromatographic peak of YQHX (positive ion mode).

**Figure S2**.PPI network and key genes discovery


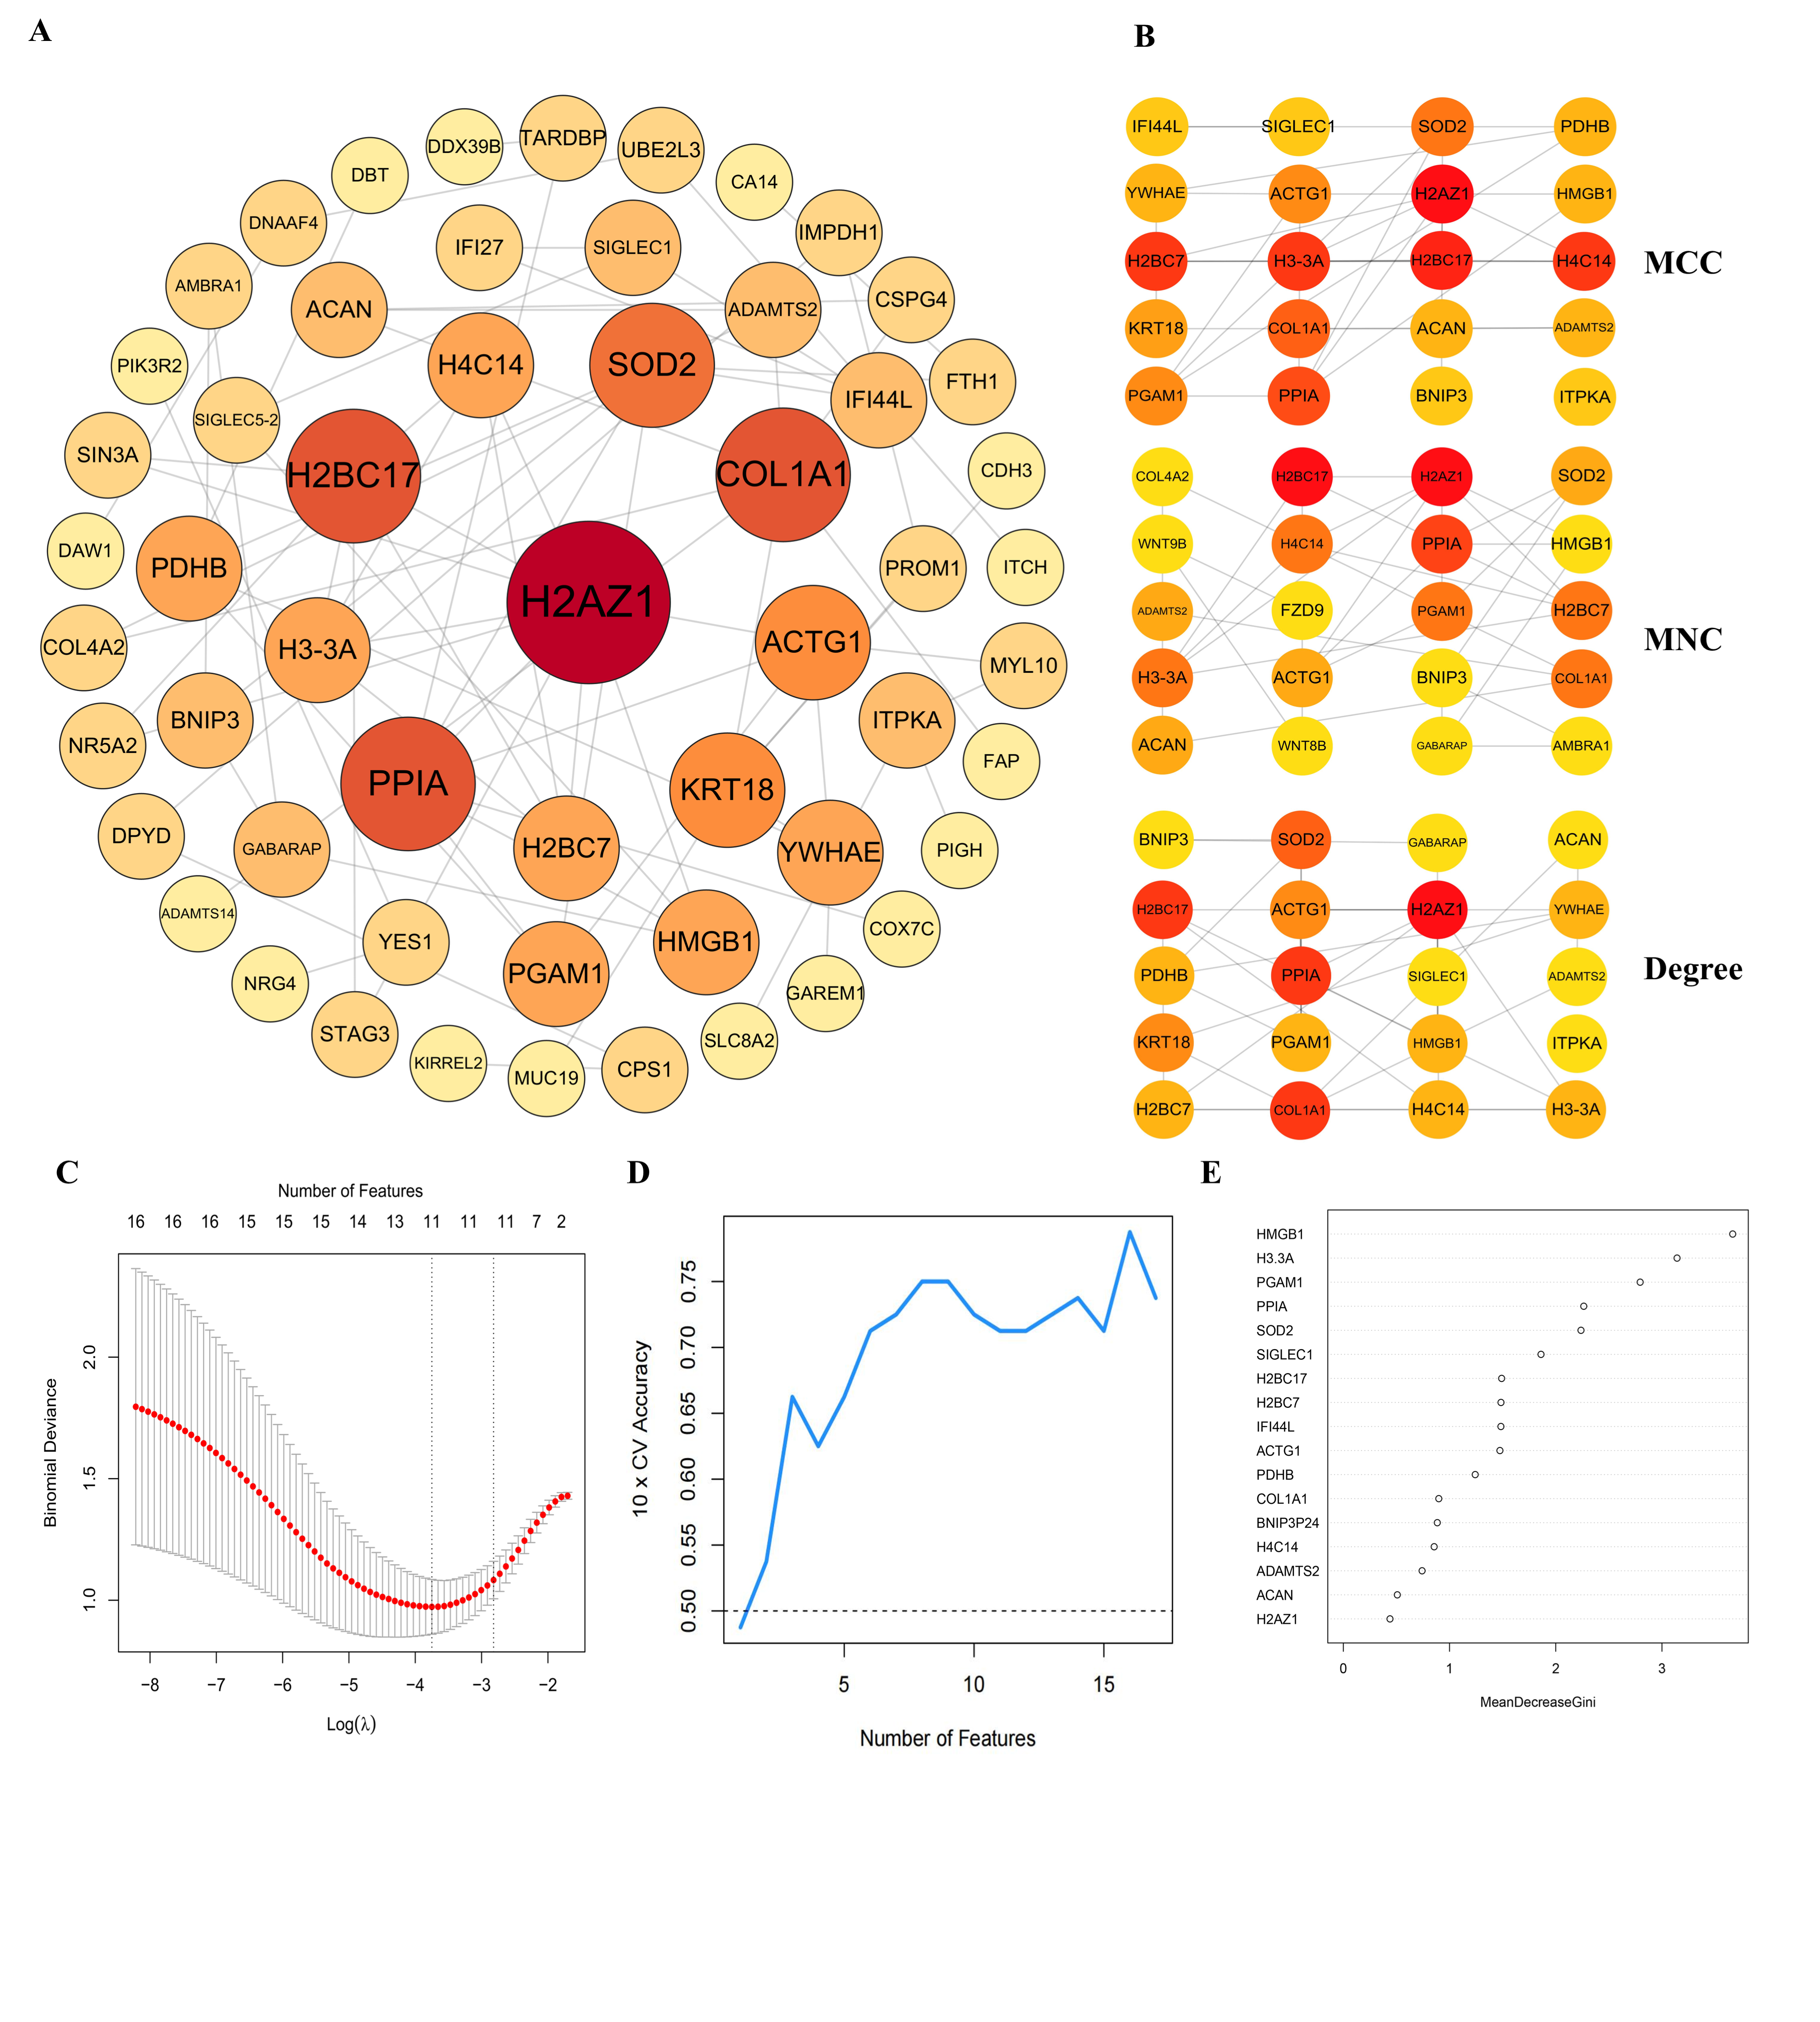


(A) The PPI network between DEGs has 55 nodes and 74 edges, the color intensity of the nodes represents the magnitude of the values, with darker colors indicating higher values. (B) The top 20 nodes of the PPI network identified by the MCC, MNC, and Degree algorithms in the CytoHubba plugin. (C) LASSO analysis screening of feature genes. (D) SVM-RFE algorithm screening of feature genes. (E) RF algorithm screening of feature genes.

**Figure S3**.PPI network and key proteins discovery


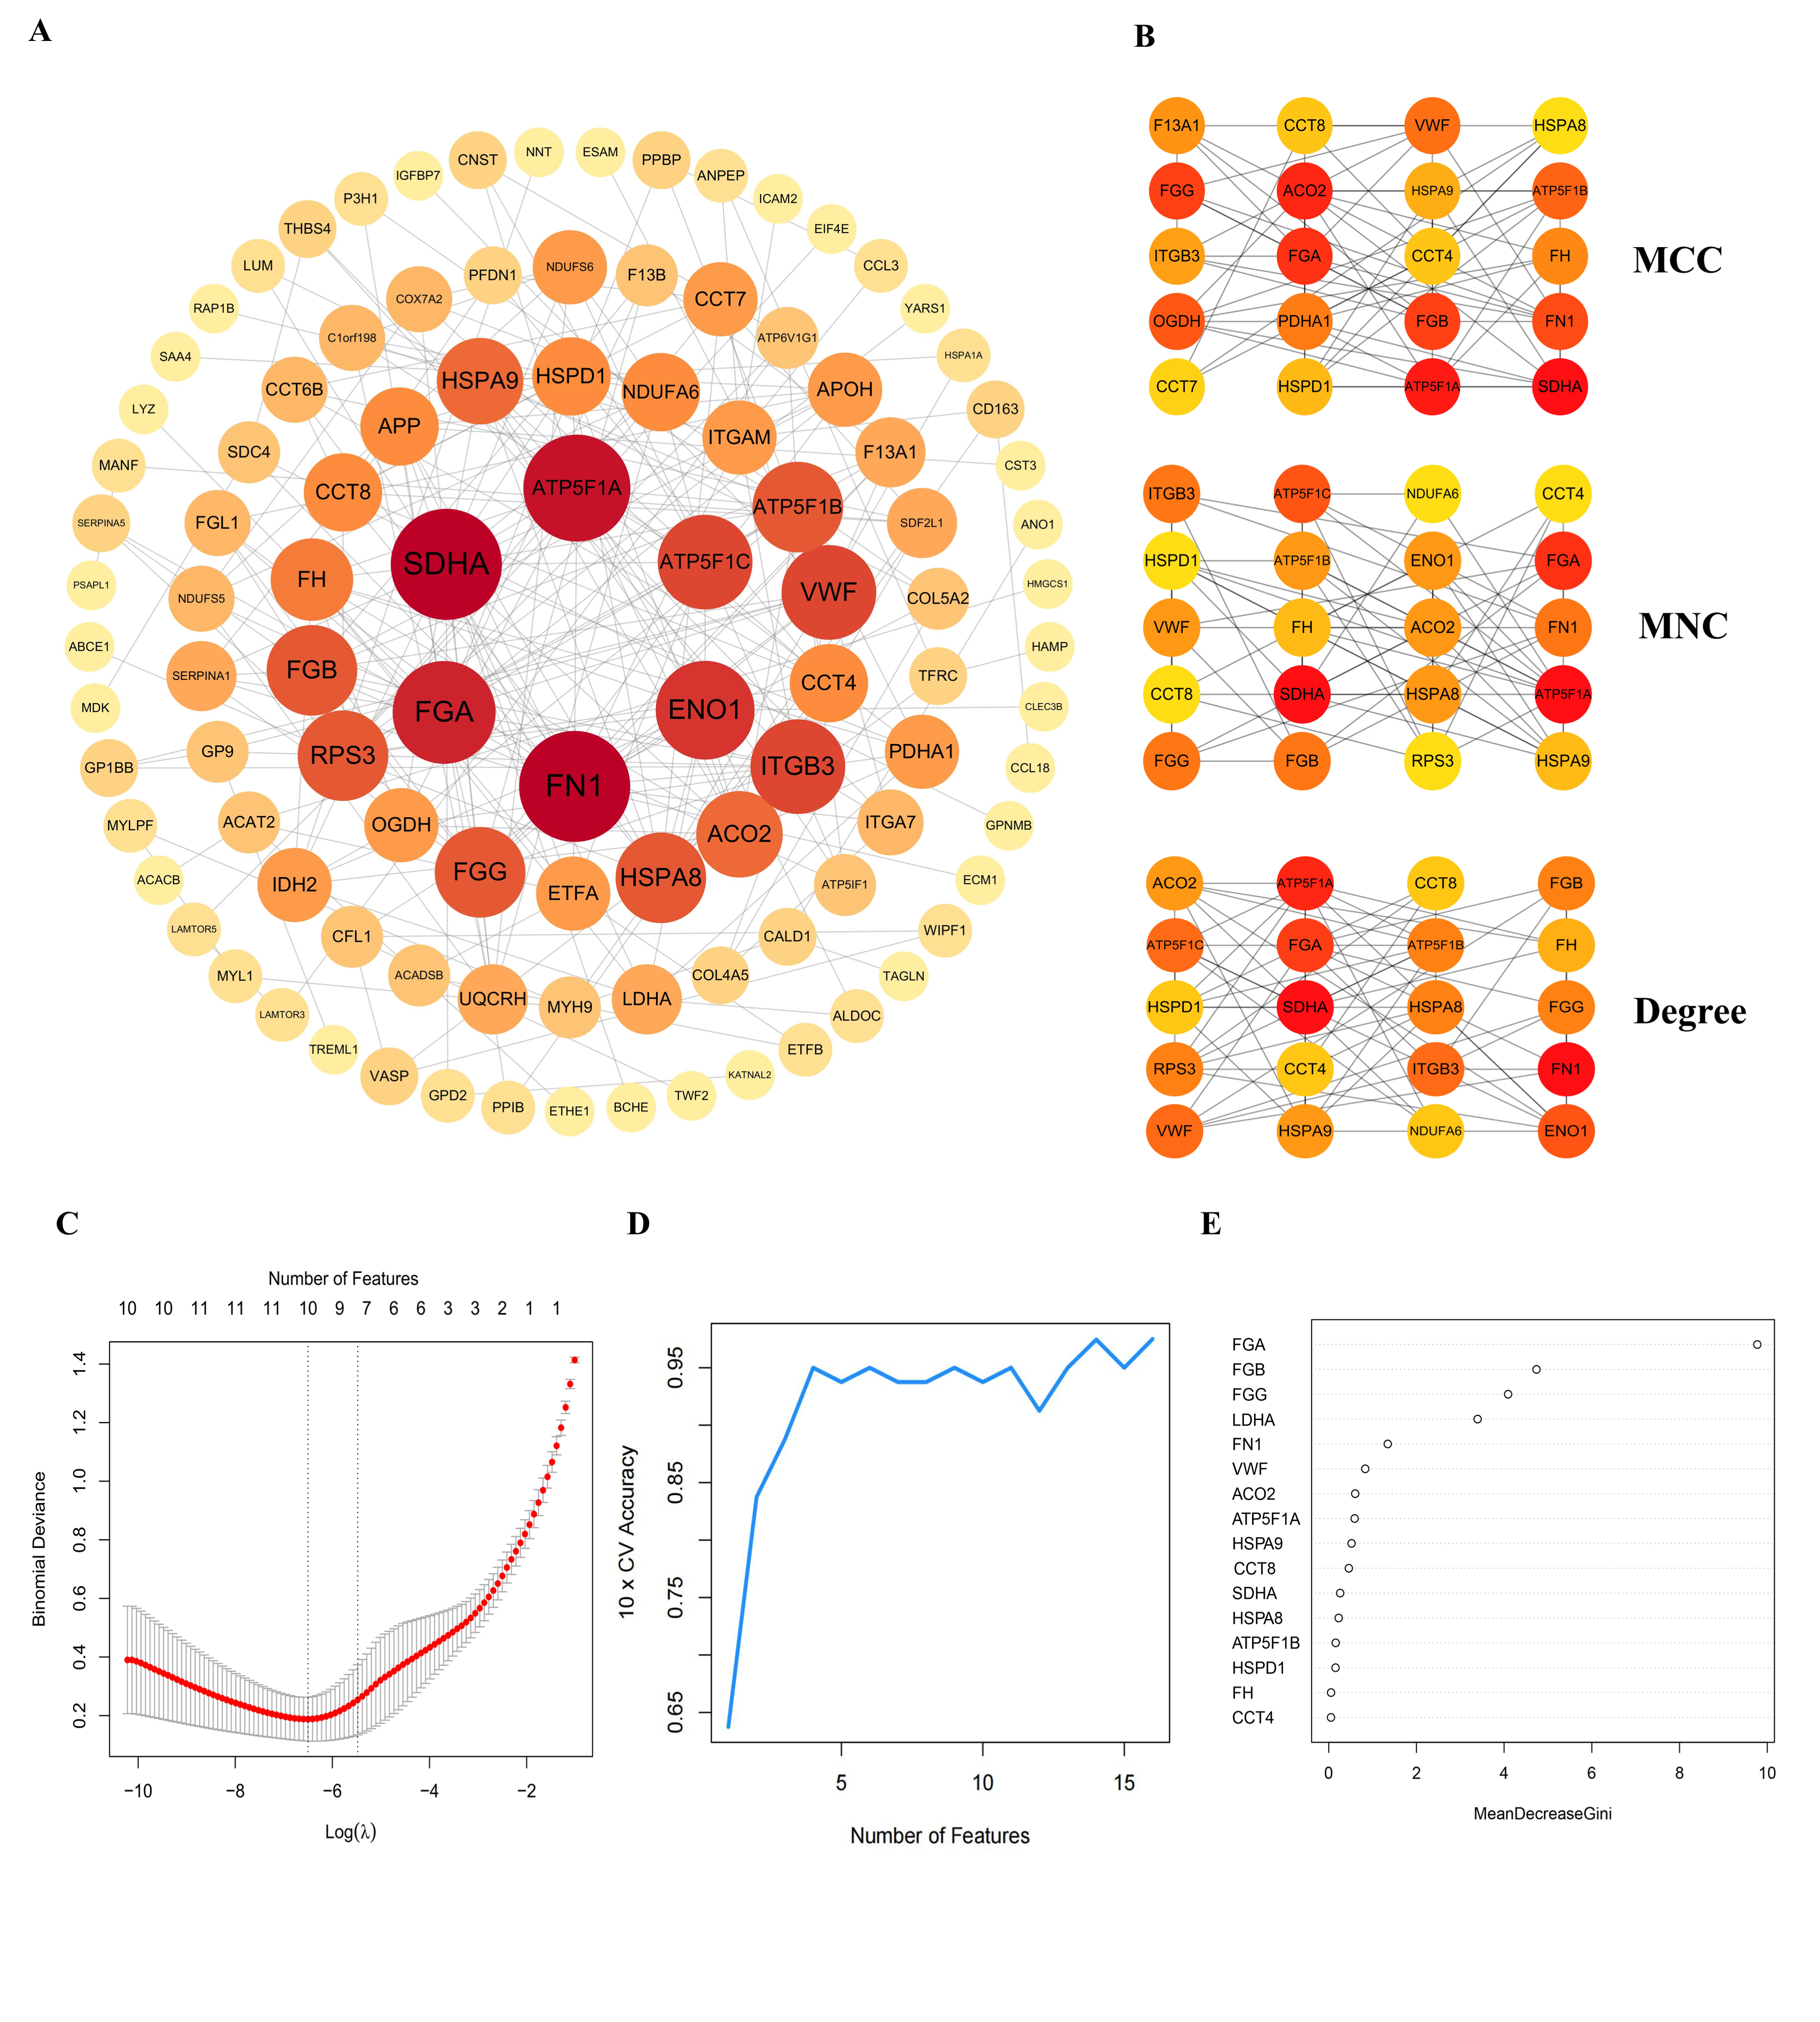


(**A)** The PPI network between DEPs has 103 nodes and 240 edges, the color intensity of the nodes represents the magnitude of the values, with darker colors indicating higher values. (**B)** The top 20 nodes of the PPI network identified by the MCC, MNC, and Degree algorithms in the CytoHubba plugin. (**C)** LASSO analysis screening of feature genes. (**D)** SVM-RFE algorithm screening of feature genes. (**E)** RF algorithm screening of feature genes.

**Figure S4.** Violin plots showing the key metabolites of YQHX treatment in IHF


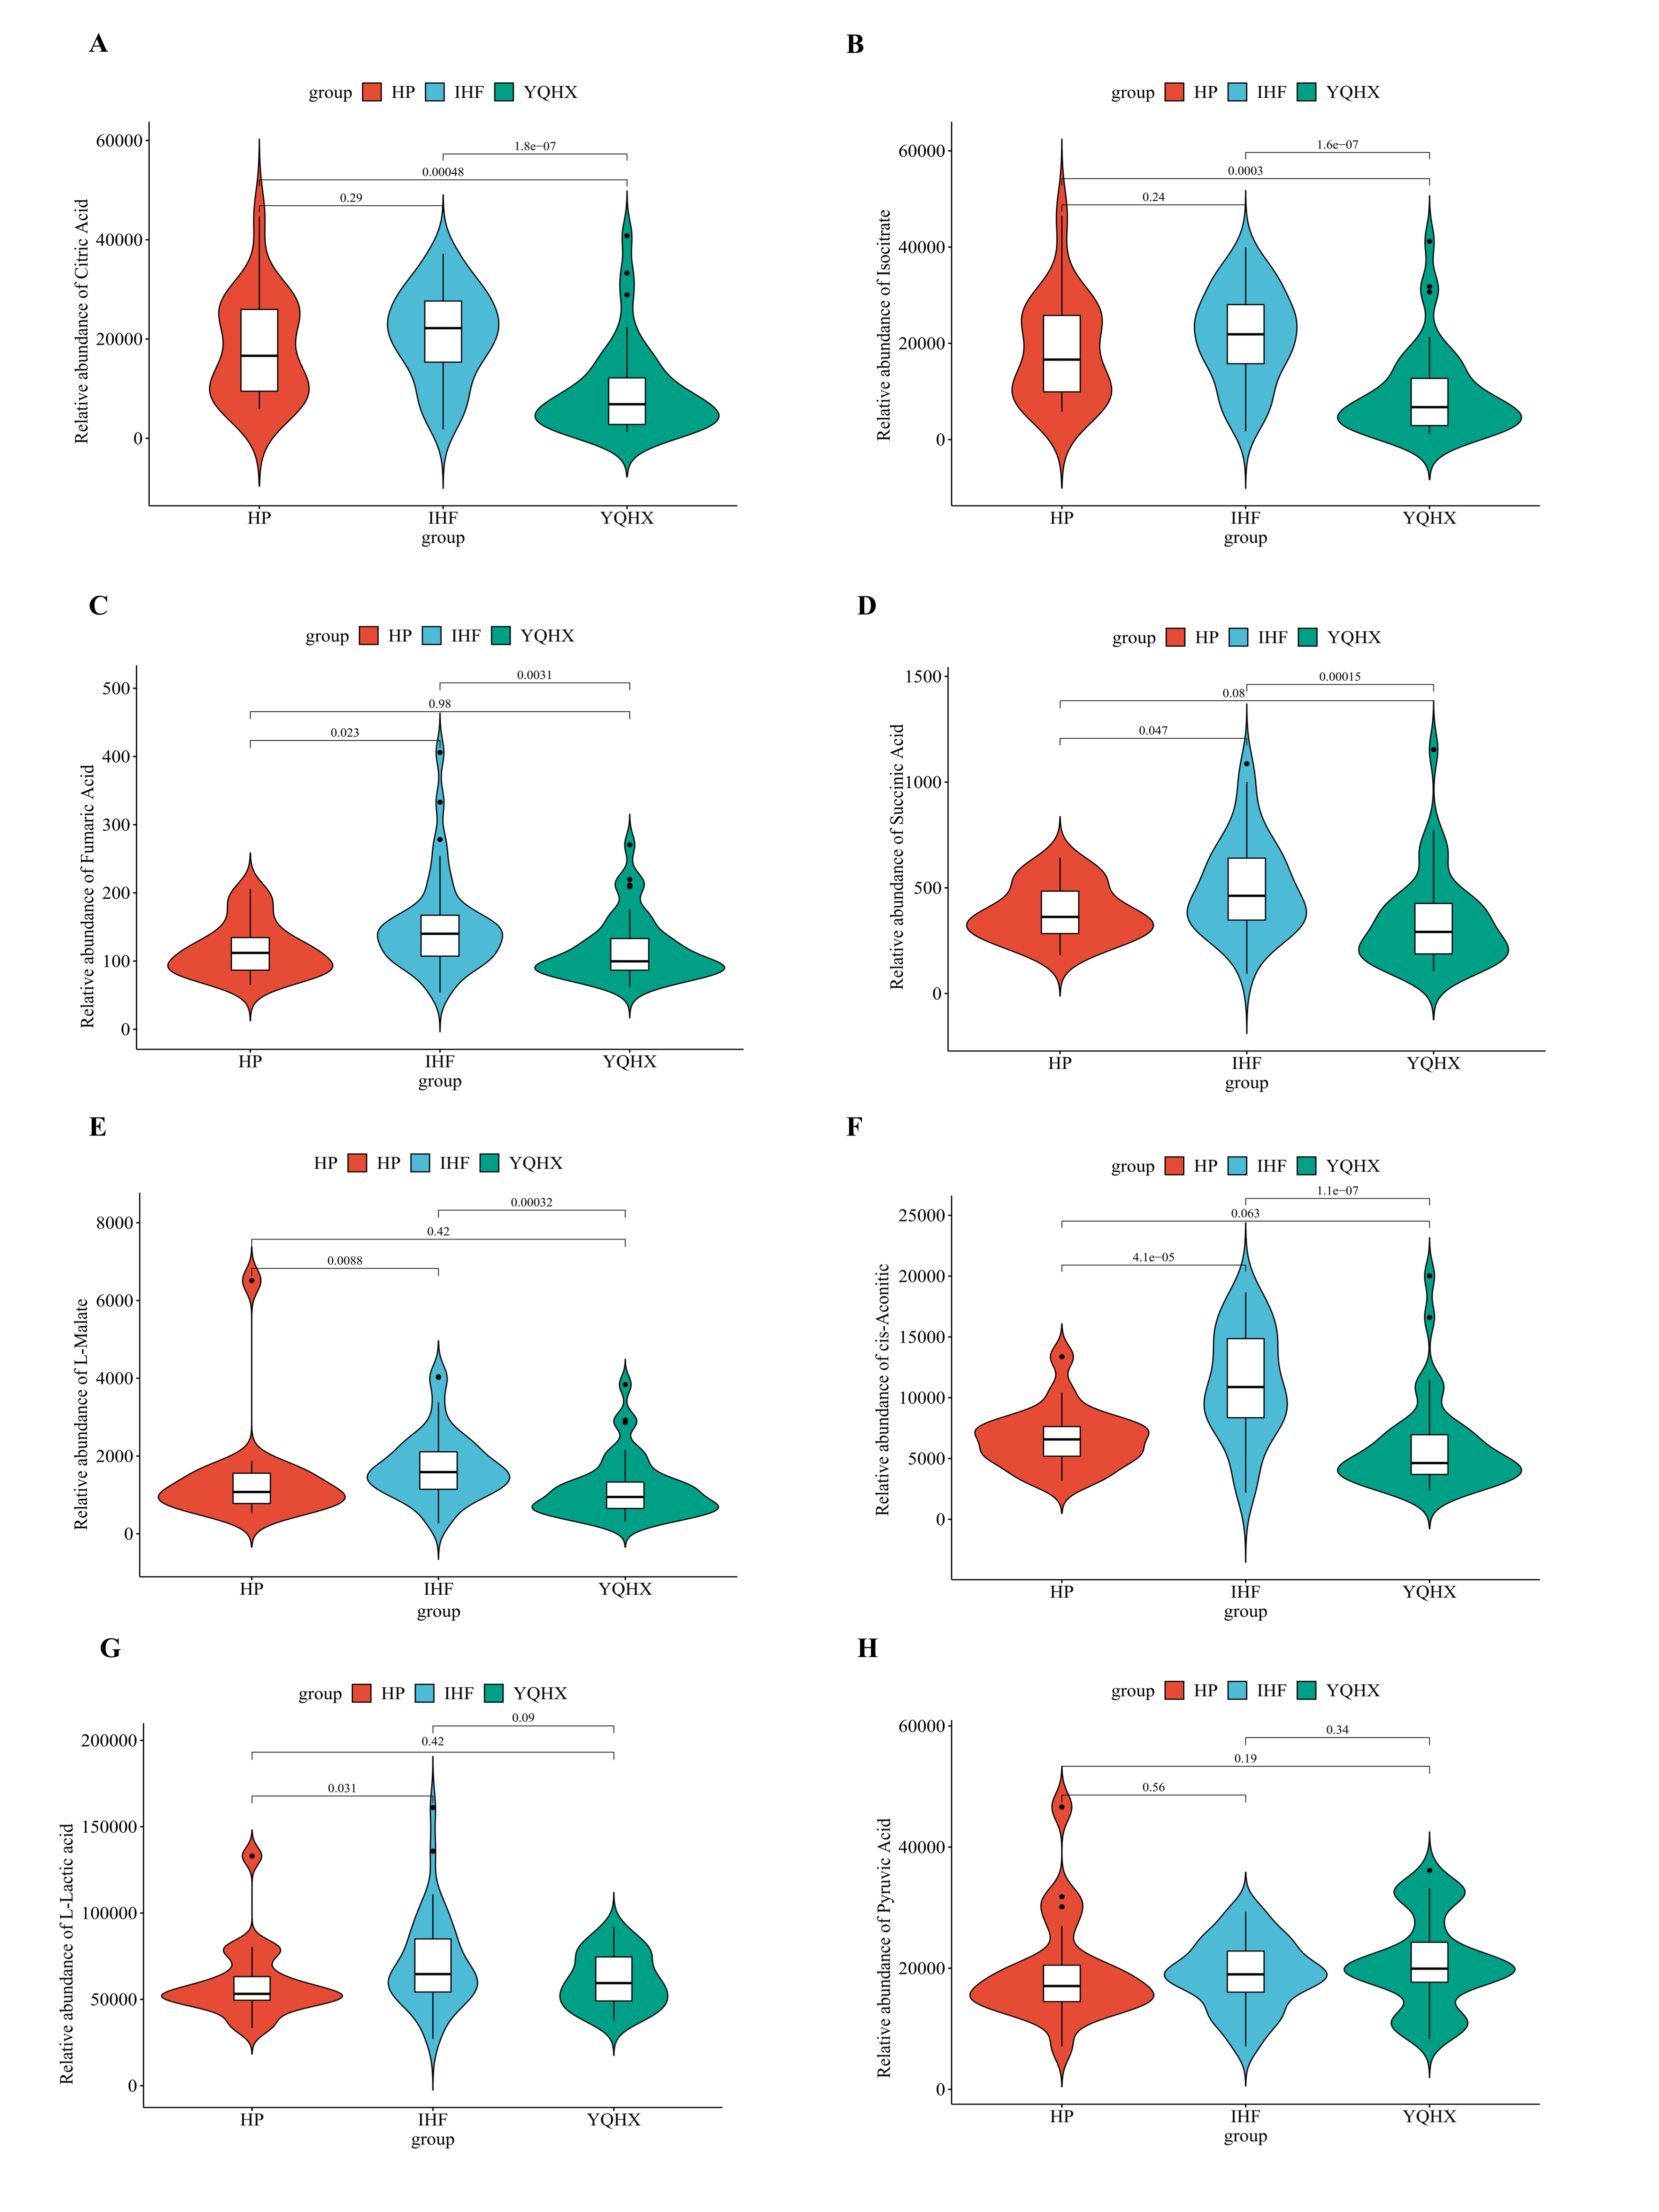


(A) Relative abundance of Citric Acid in each group. (B) Relative abundance of Isocitrate in each group. (C) Relative abundance of Fumaric Acid in each group. (D) Relative abundance of Succinic Acid in each group. (E) Relative abundance of L-Malate in each group. (F) Relative abundance of cis-Aconitic acid in each group. (G) Relative abundance of L-Lactic acid in each group. (H) Relative abundance of Pyruvic Acid in each group.
